# Supplementary material
Source: PubMed Central journal article supplement (PMC2290784)

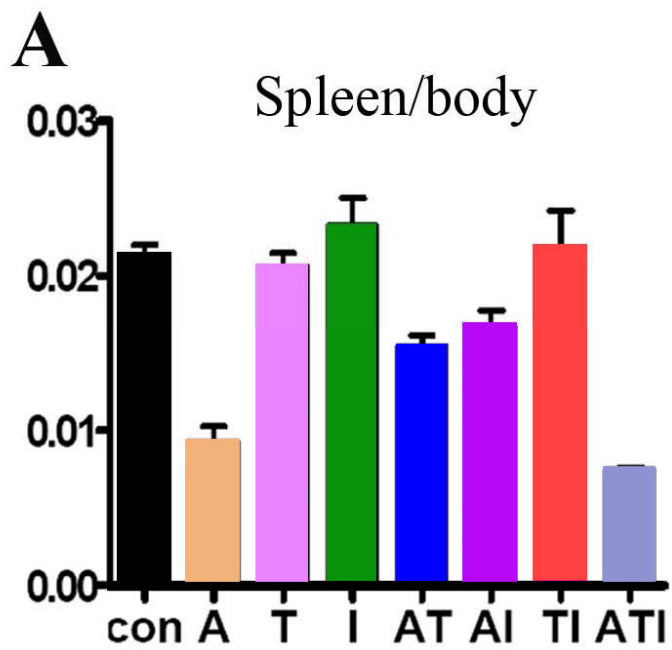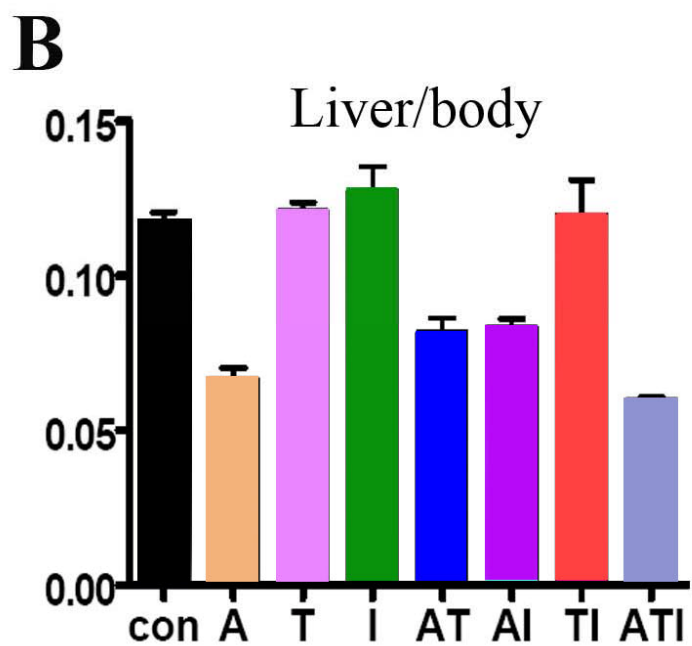

Supplement: pnas_0712365105_1.pdf [file pnas_0712365105_1.pdf]

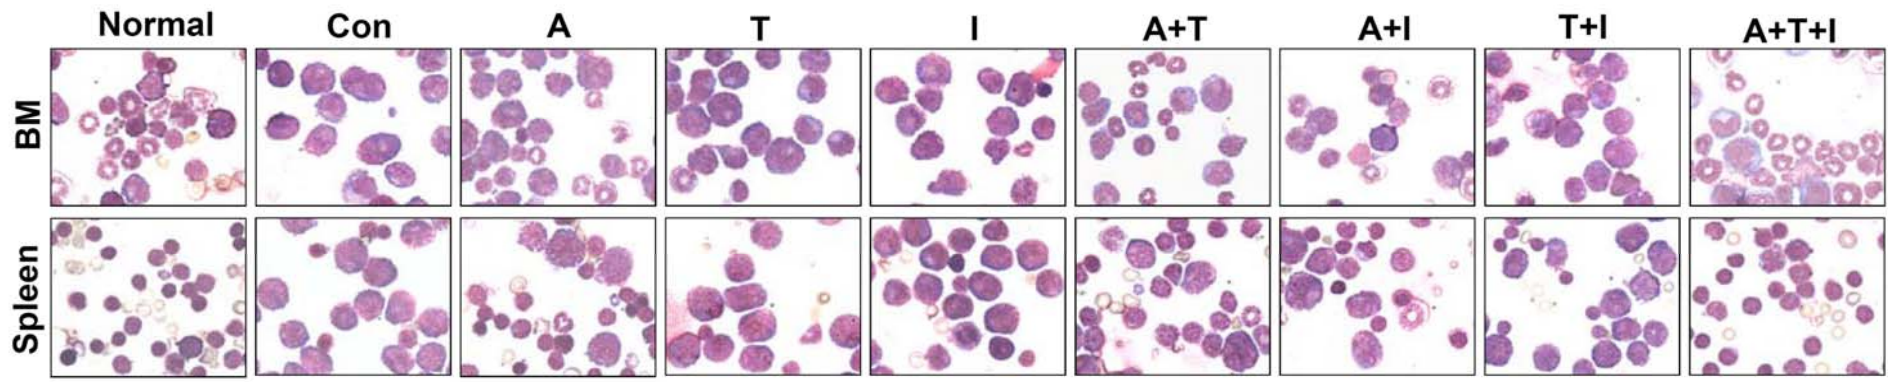

Supplement: pnas_0712365105_2.pdf [file pnas_0712365105_2.pdf]

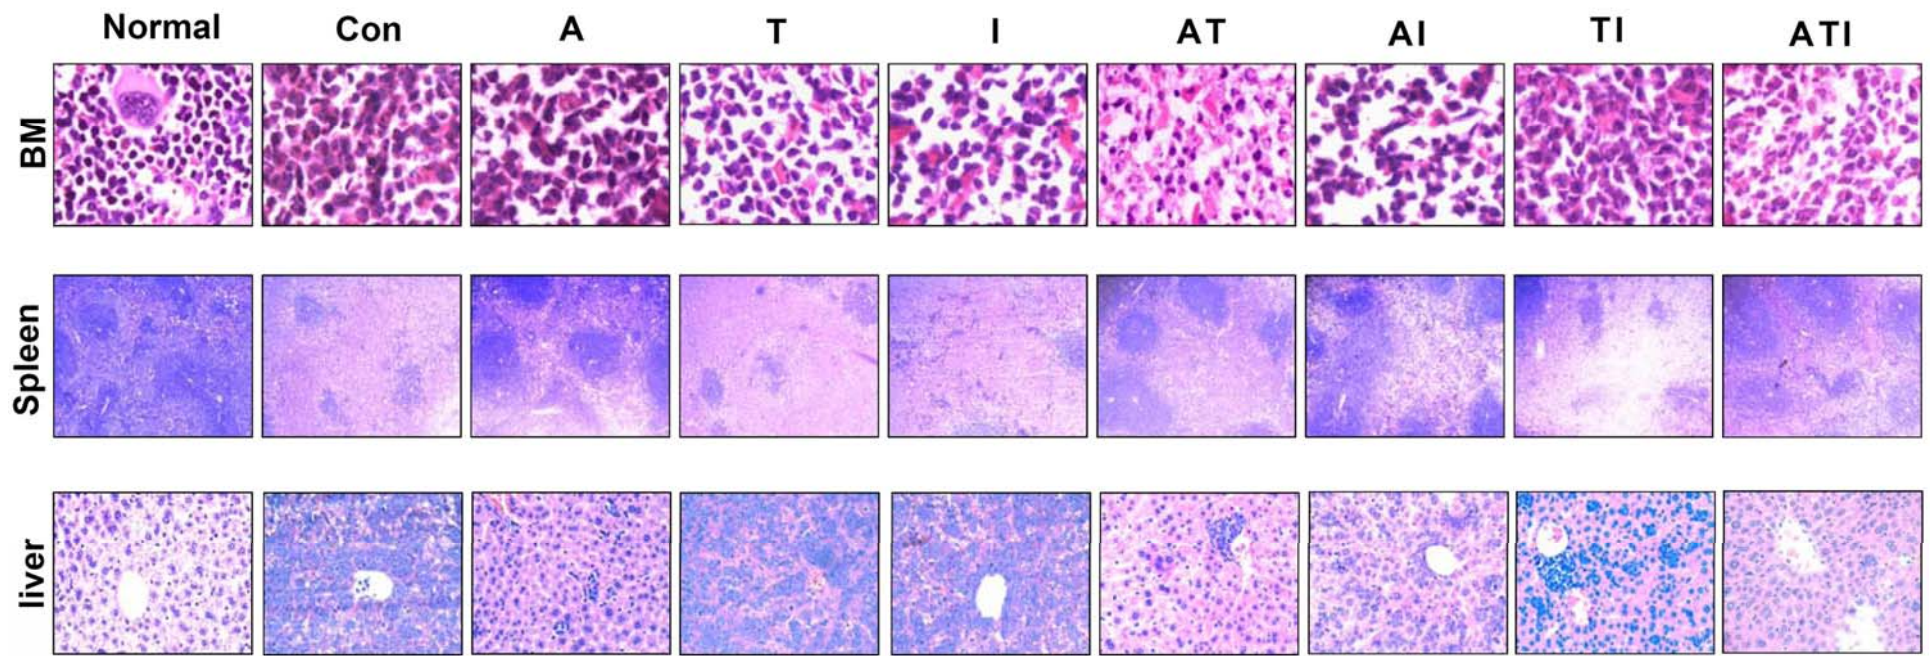

Supplement: pnas_0712365105_3.pdf [file pnas_0712365105_3.pdf]

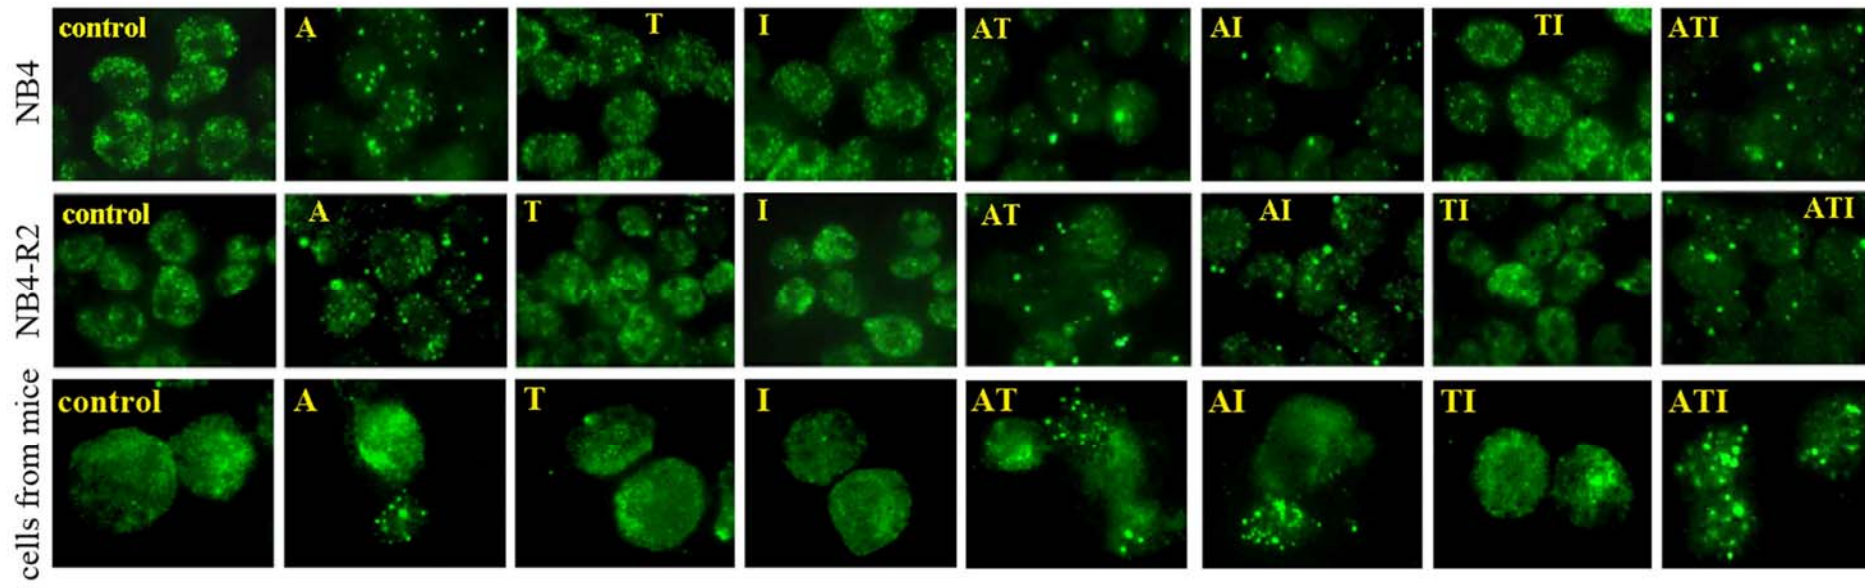

Supplement: pnas_0712365105_4.pdf [file pnas_0712365105_4.pdf]
